# Supplementary material for: A new approach for the synthesis of bisindoles through AgOTf as catalyst
Source: PubMed Central journal article supplement (PMC4168942; doi:10.3762/bjoc.10.228), 2014-09-17
Supplement: Beilstein_J_Org_Chem-10-2206-s001.pdf [file Beilstein_J_Org_Chem-10-2206-s001.pdf]

## Supporting Information

for

### A new approach for the synthesis of bisindoles through AgOTf as catalyst

Jorge Beltrá<sup>1</sup>, M. Concepción Gimeno\*<sup>1</sup> and Raquel P. Herrera\*<sup>2</sup>

Address: <sup>1</sup>Departamento de Química Inorgánica. Instituto de Síntesis Química y Catálisis Homogénea (ISQCH), CSIC-Universidad de Zaragoza. E-50009 Zaragoza, Spain and

<sup>2</sup>Departamento de Química Orgánica. Instituto de Síntesis Química y Catálisis Homogénea (ISQCH), CSIC-Universidad de Zaragoza. E-50009 Zaragoza, Spain.

E-mail: M. Concepción\* Gimeno - gimeno@unizar.es; Raquel P. Herrera\* - raquelph@unizar.es

\*Corresponding author

**<sup>1</sup>H NMR for all synthesized compounds, <sup>13</sup>C APT NMR spectra for compounds 6ac and 6ad and crystallographic data for compounds 6ad and 6al**

**General experimental methods.** Purification of reaction products was carried out by flash chromatography using silical-gel (0.063-0.200 mm). Analytical thin layer chromatography was performed on 0.25 mm silical gel 60-F plates. <sup>1</sup>H-NMR spectra were recorded at 400 MHz; <sup>13</sup>APT-NMR spectra were recorded at 100 MHz; CDCl<sub>3</sub> as the solvent. Chemical shifts were reported in the  $\delta$  scale relative to central line of CDCl<sub>3</sub> (77 ppm) for <sup>13</sup>APT-NMR.

**Materials.** All commercially available solvents and reagents were used as received. The <sup>1</sup>H and <sup>13</sup>C NMR spectra for compounds **6aa** [1], **6ab** [2], **6ac** [3], **6ad** [4], **6ae** [5], **6af** [6], **6ag** [7], **6ah** [8], **6ai** [9], **6aj** [4], **6ak** [3], **6ba** [10], **6ca** [11], **6da** [12], **6ea** [12], are consistent with values previously reported in the literature.

**<sup>1</sup>H NMR spectrum for the crude of the reaction giving 6aa (400 MHz, CDCl<sub>3</sub>)**

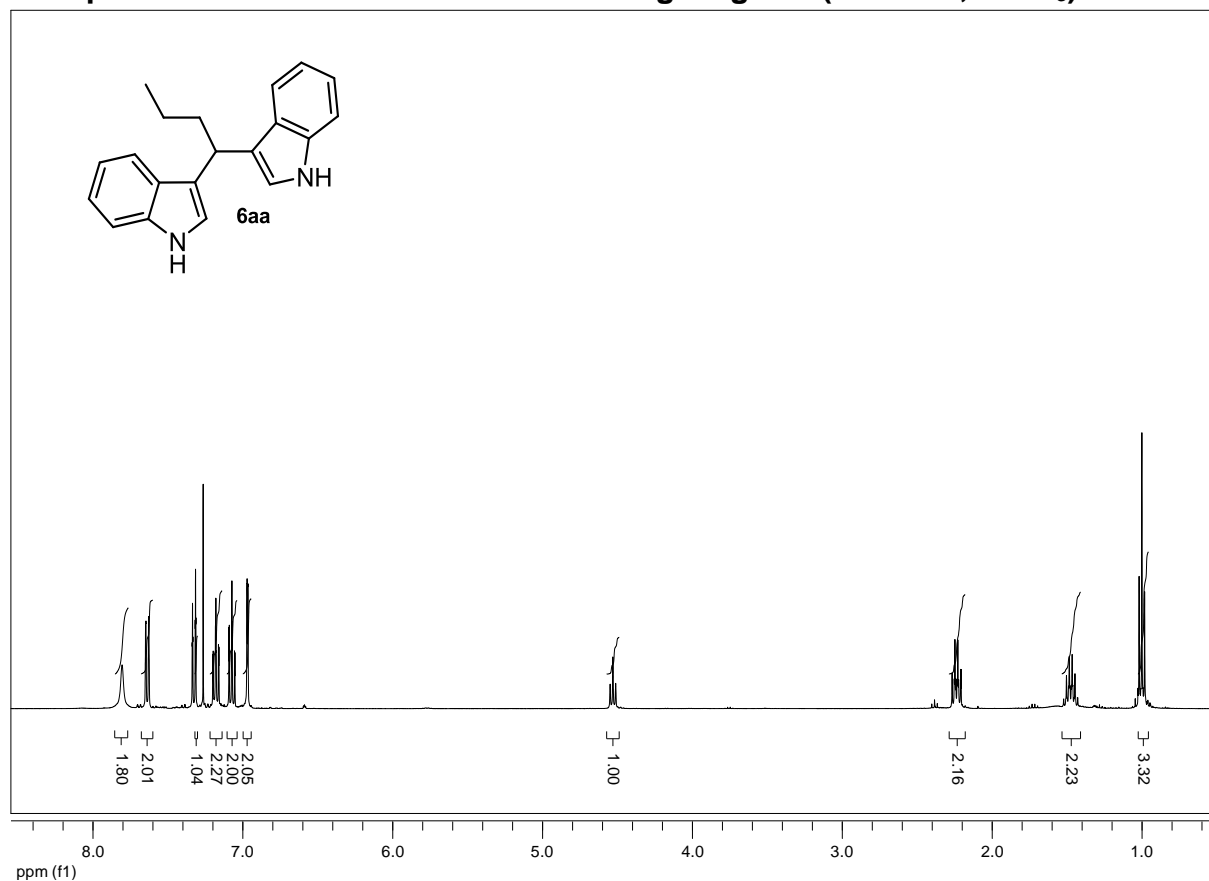

**<sup>1</sup>H NMR spectrum for the crude of the reaction giving 6ab (400 MHz, CDCl<sub>3</sub>)**

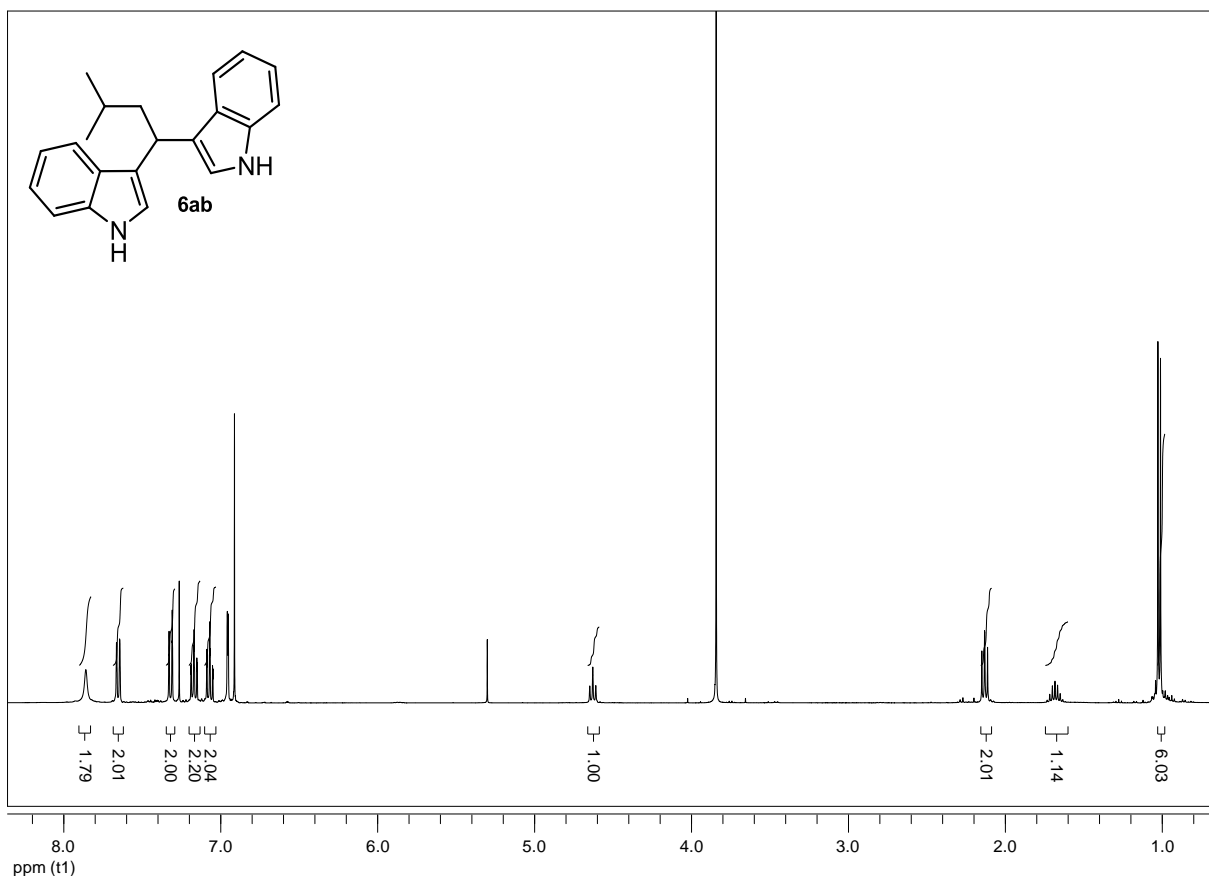

**<sup>1</sup>H NMR spectrum for compound 6ac (400 MHz, CDCl<sub>3</sub>)**

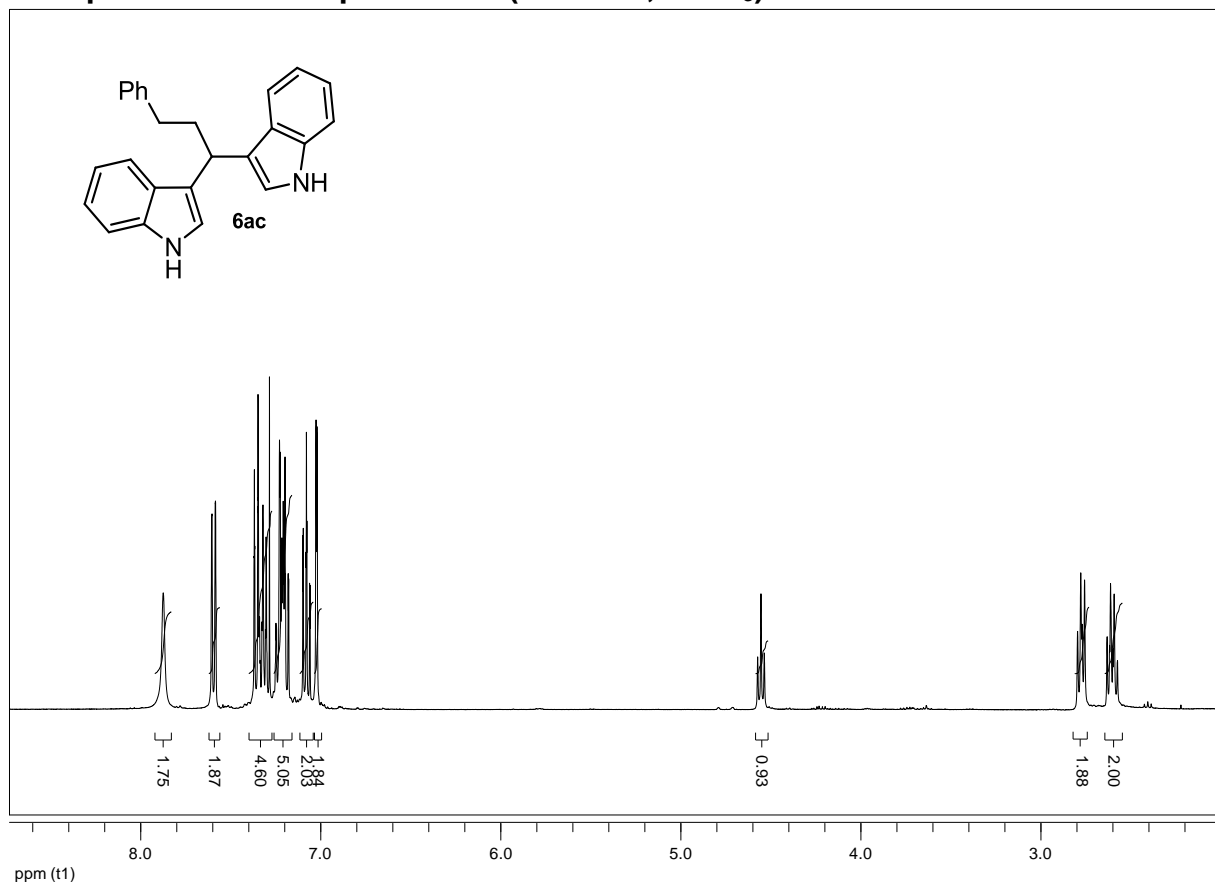

**<sup>13</sup>C NMR spectrum for compound 6ac (100 MHz, CDCl<sub>3</sub>)**

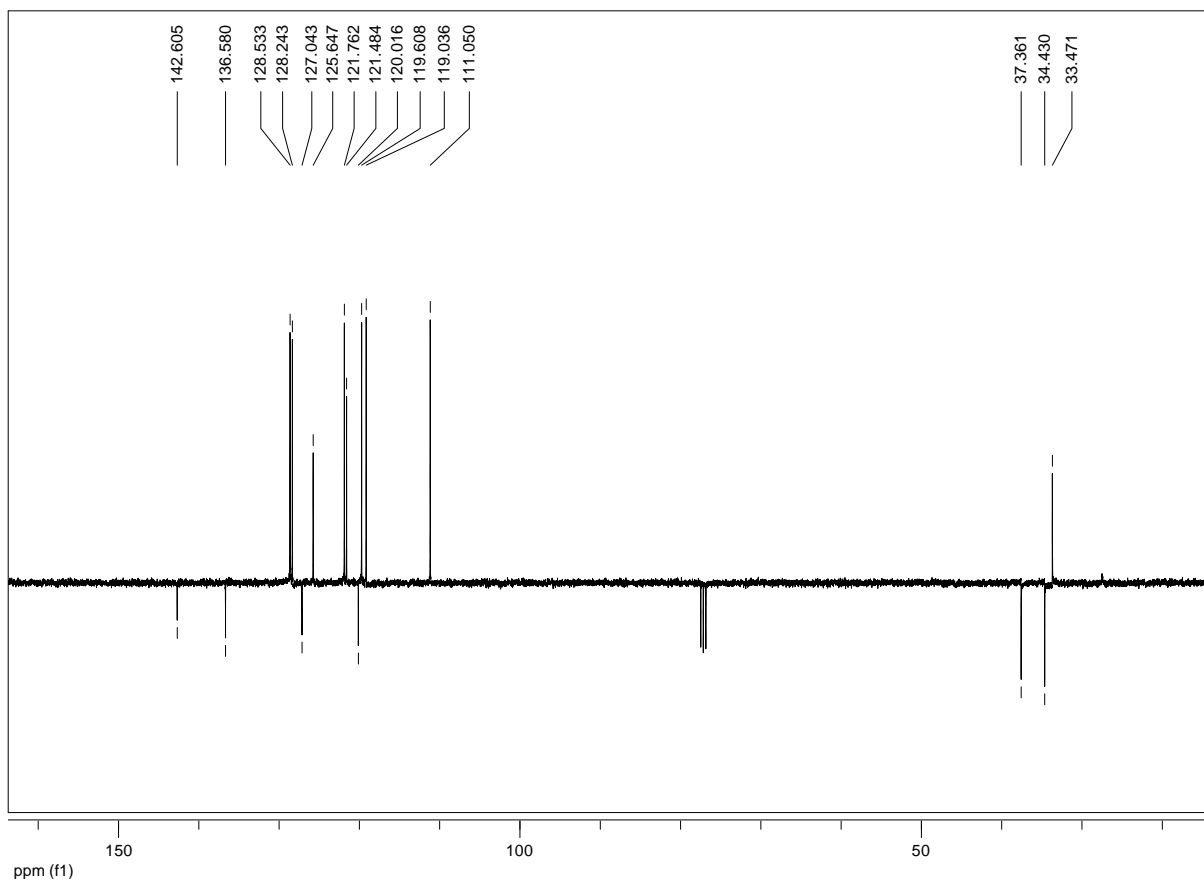

**<sup>1</sup>H NMR spectrum for compound 6ad (400 MHz, CDCl<sub>3</sub>)**

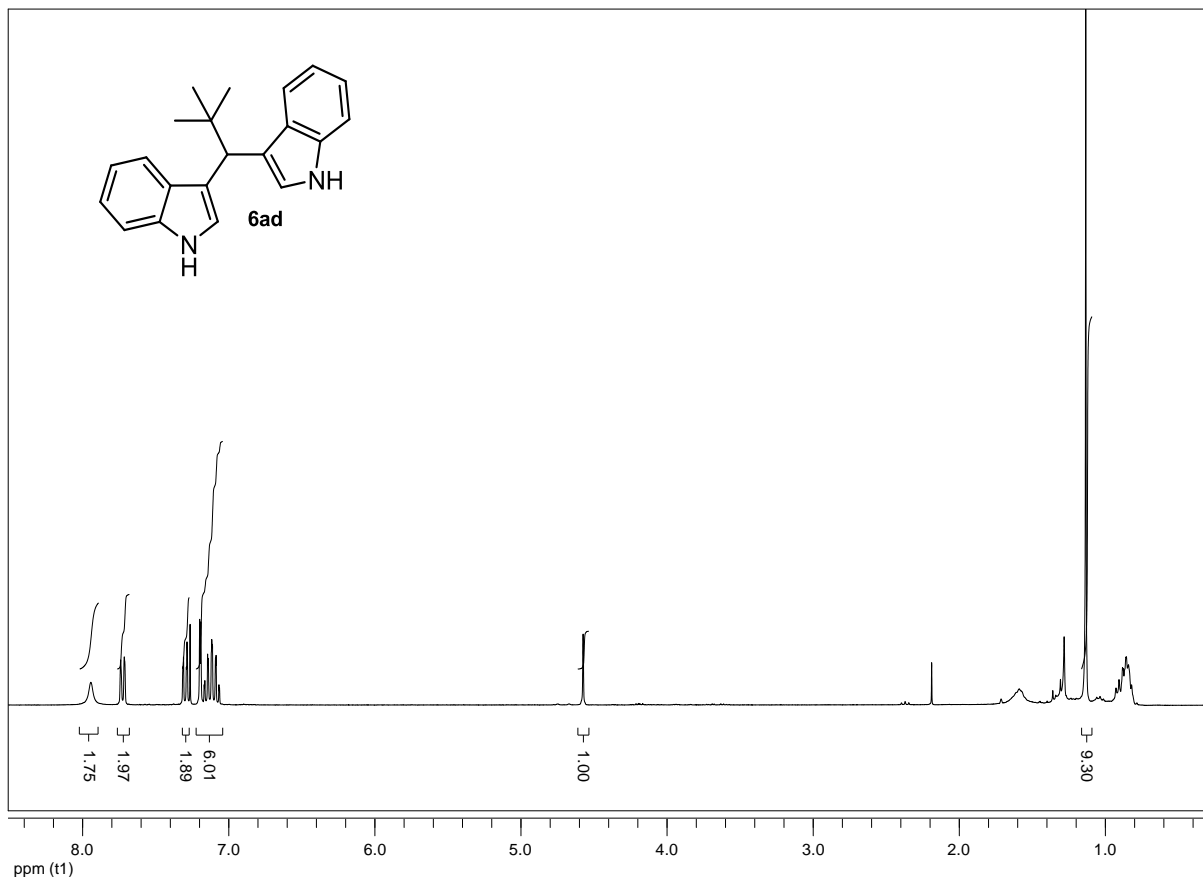

**<sup>13</sup>C NMR spectrum for compound 6ad (100 MHz, CDCl<sub>3</sub>)**

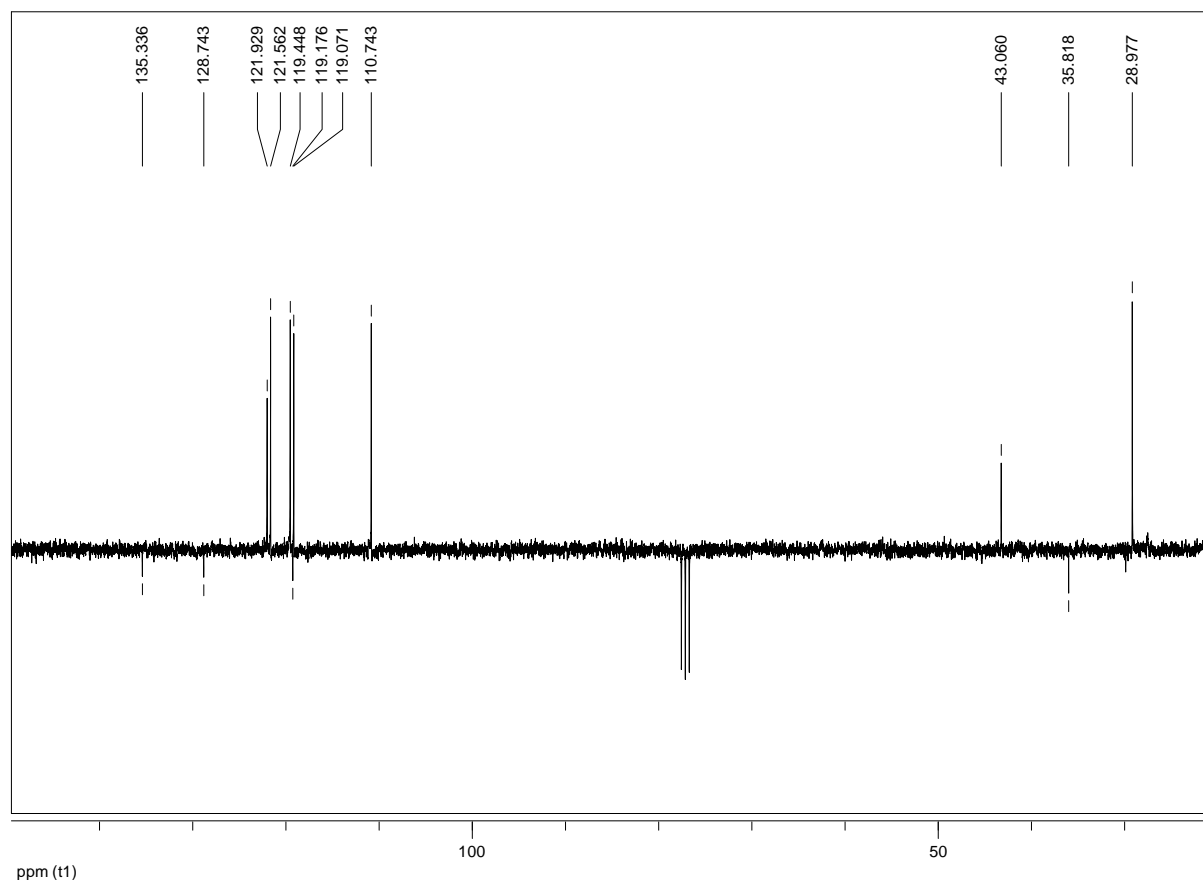

**<sup>1</sup>H NMR spectrum for compound 6ae (400 MHz, CDCl<sub>3</sub>)**

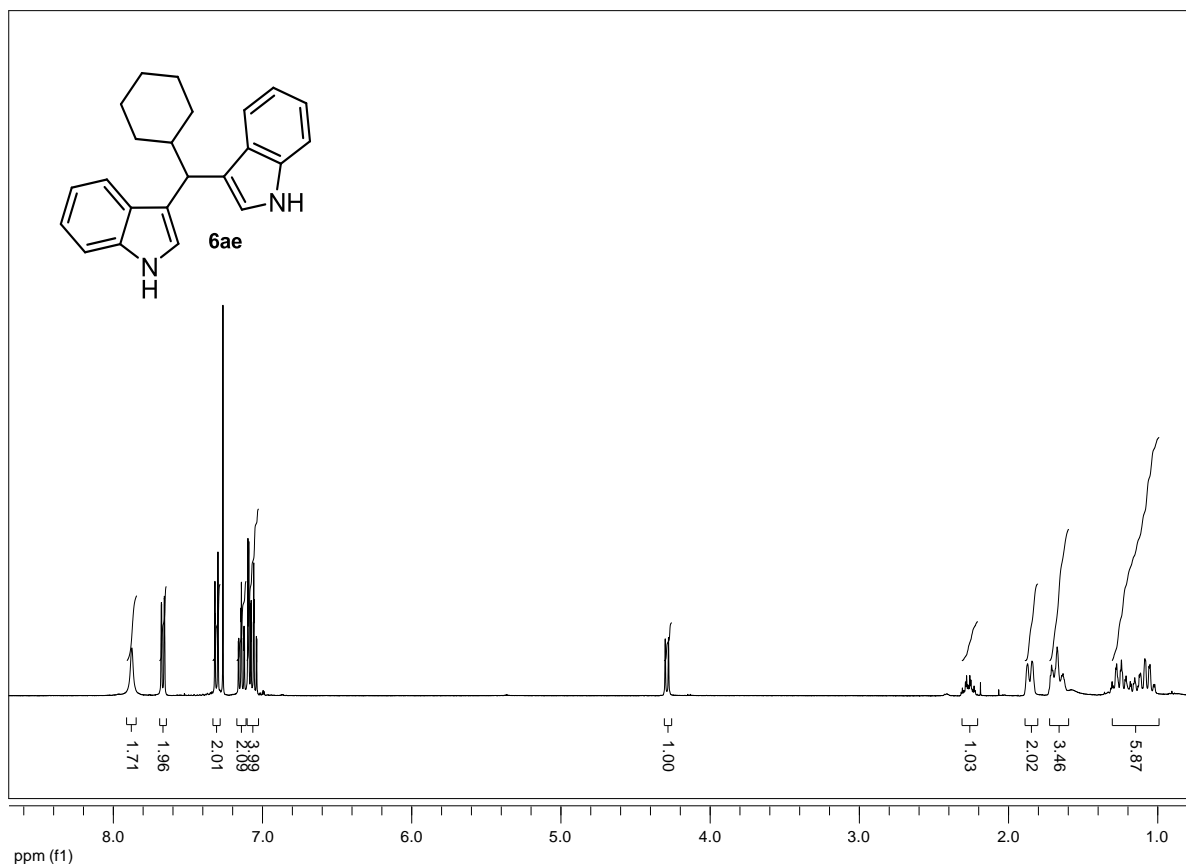

**<sup>1</sup>H NMR spectrum for compound 6af (400 MHz, CDCl<sub>3</sub>)**

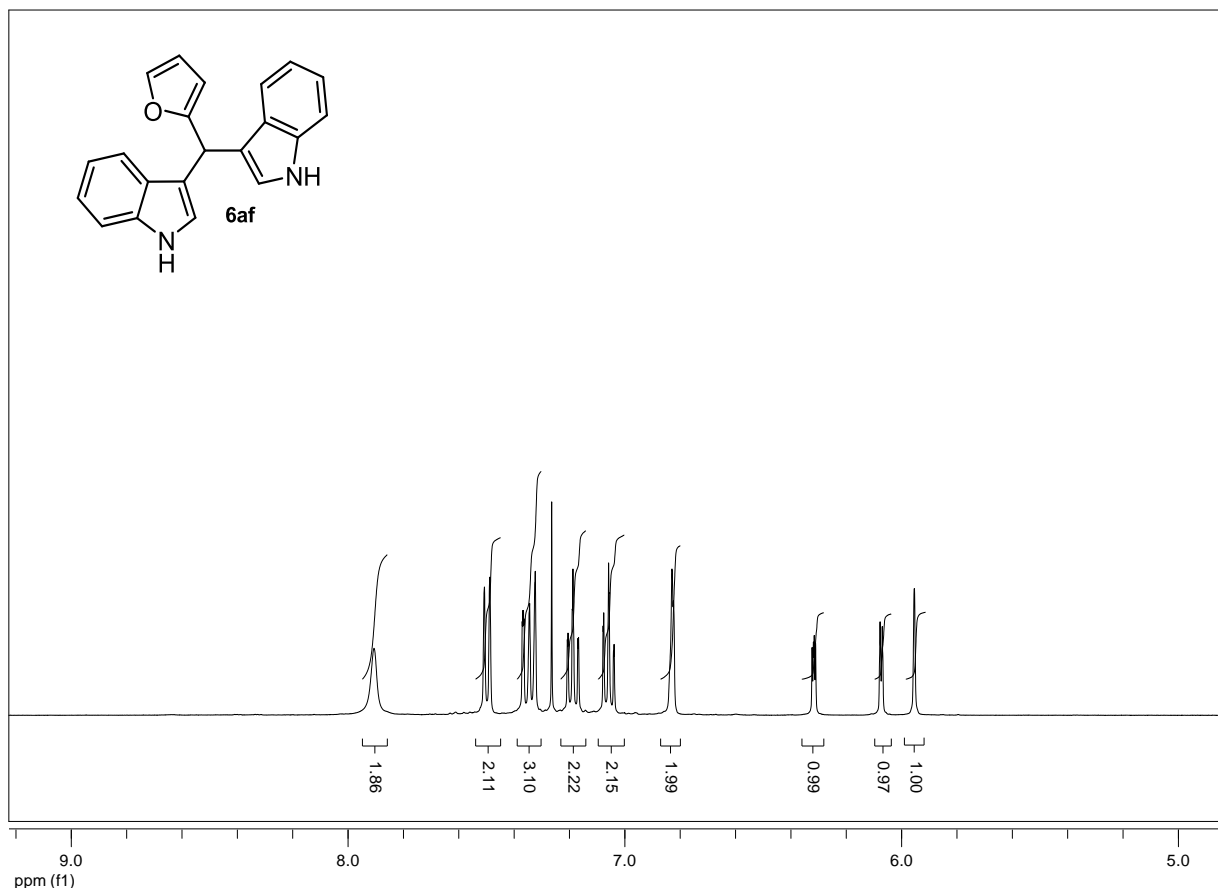

**<sup>1</sup>H NMR spectrum for compound 6ag (400 MHz, CDCl<sub>3</sub>)**

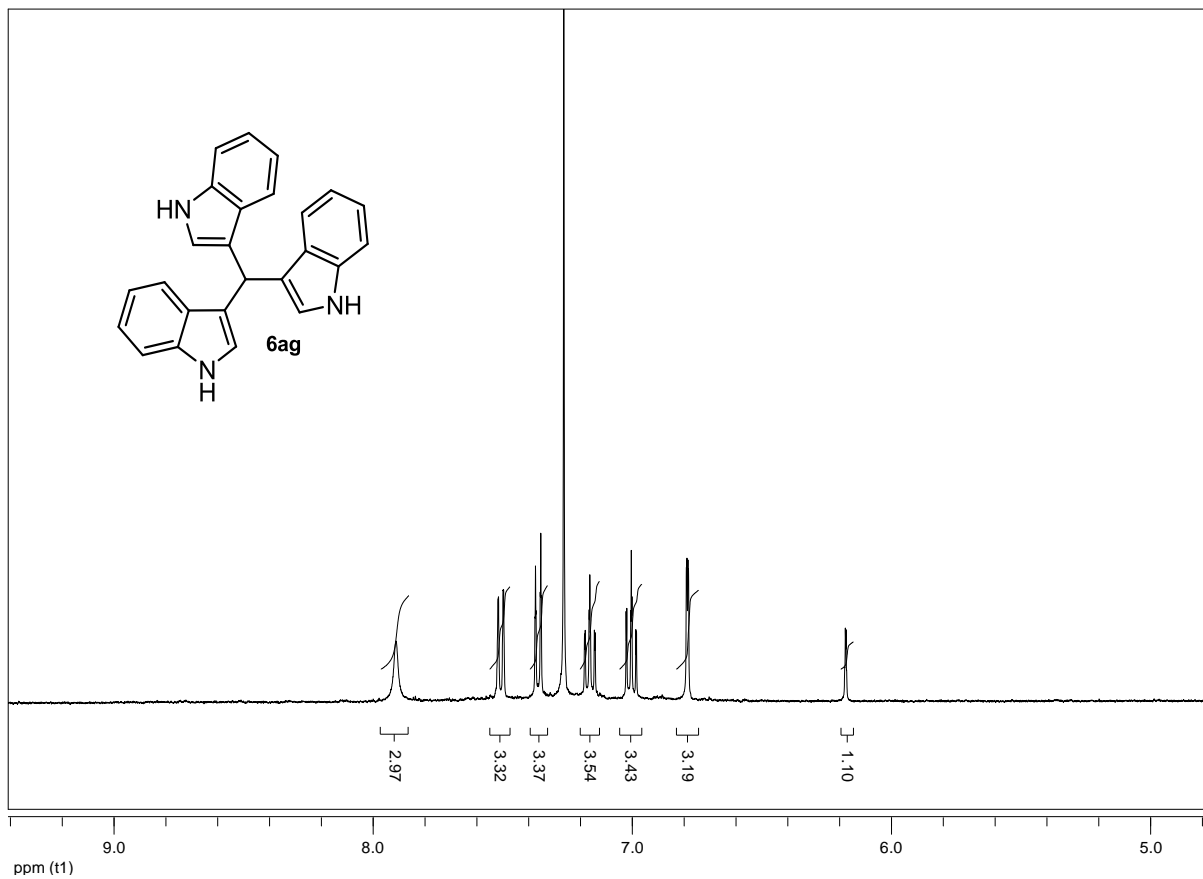

**<sup>1</sup>H NMR spectrum for compound 6ah (400 MHz, CDCl<sub>3</sub>)**

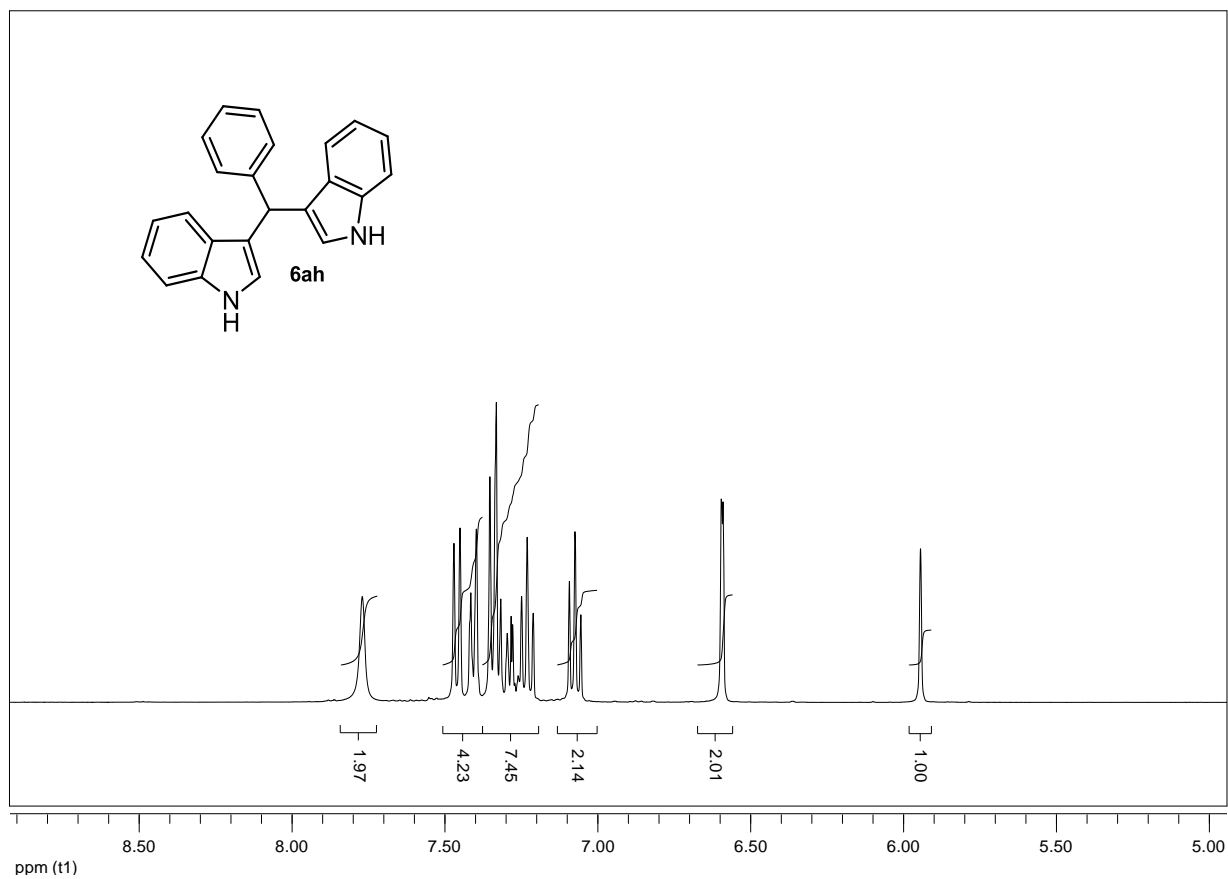

**<sup>1</sup>H NMR spectrum for the crude of the reaction giving 6ai (400 MHz, CDCl<sub>3</sub>)**

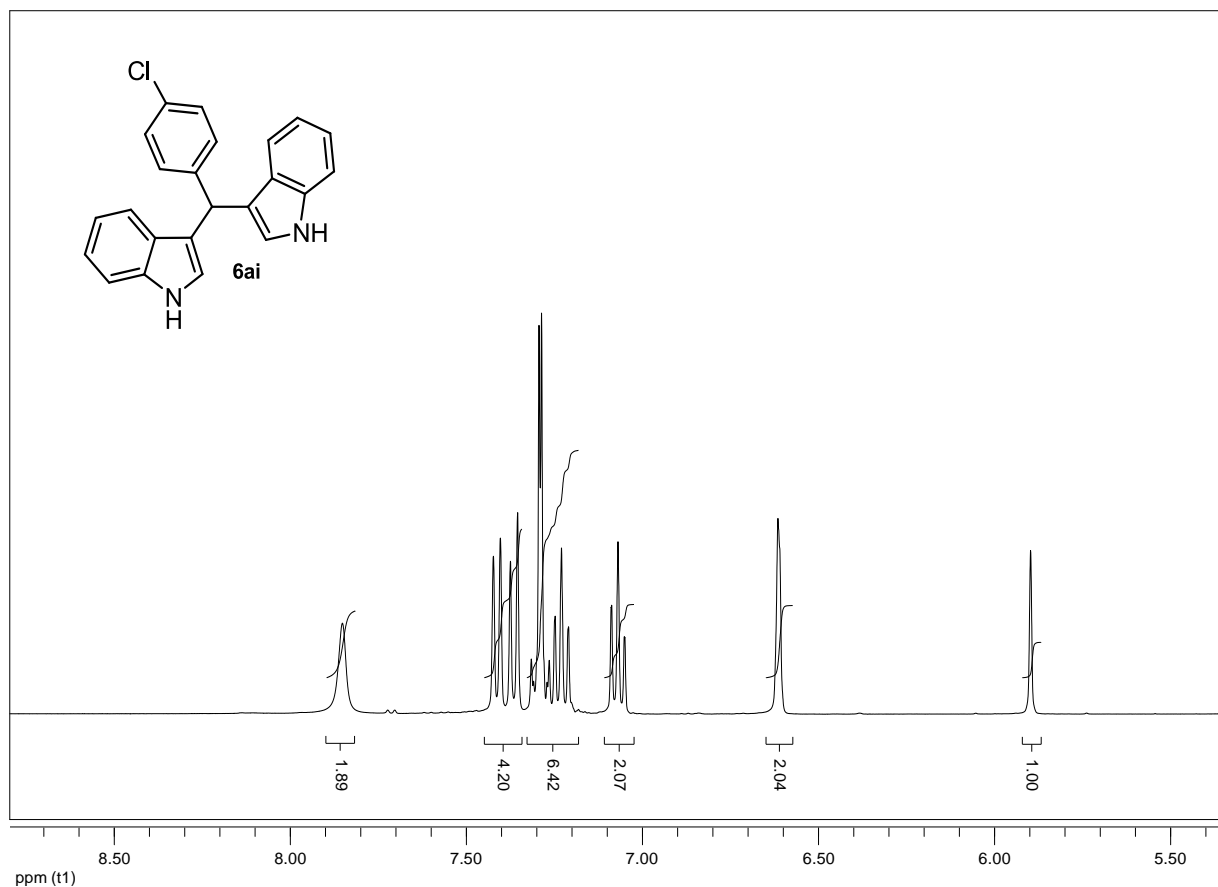

**<sup>1</sup>H NMR spectrum compound 6aj (400 MHz, CDCl<sub>3</sub>)**

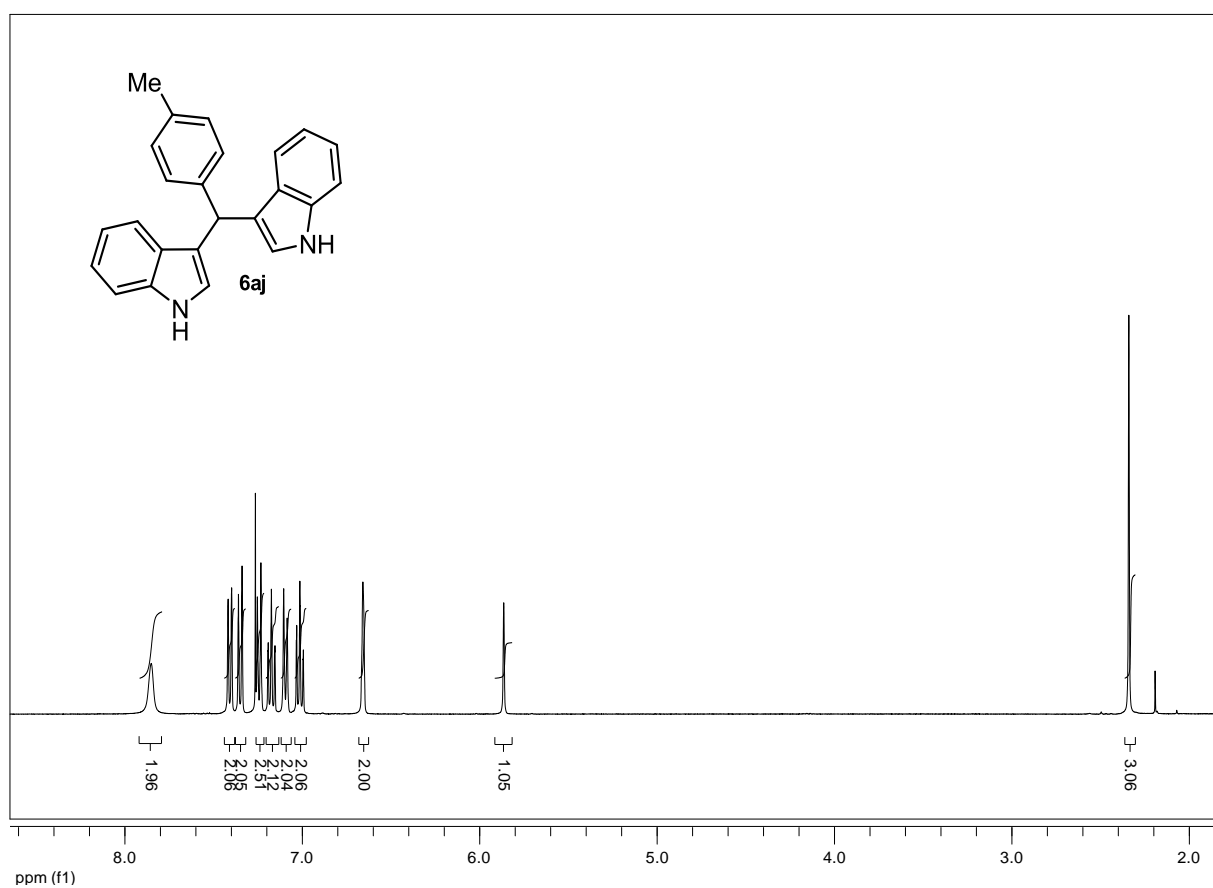

**<sup>1</sup>H NMR spectrum for compound 6ak (400 MHz, CDCl<sub>3</sub>)**

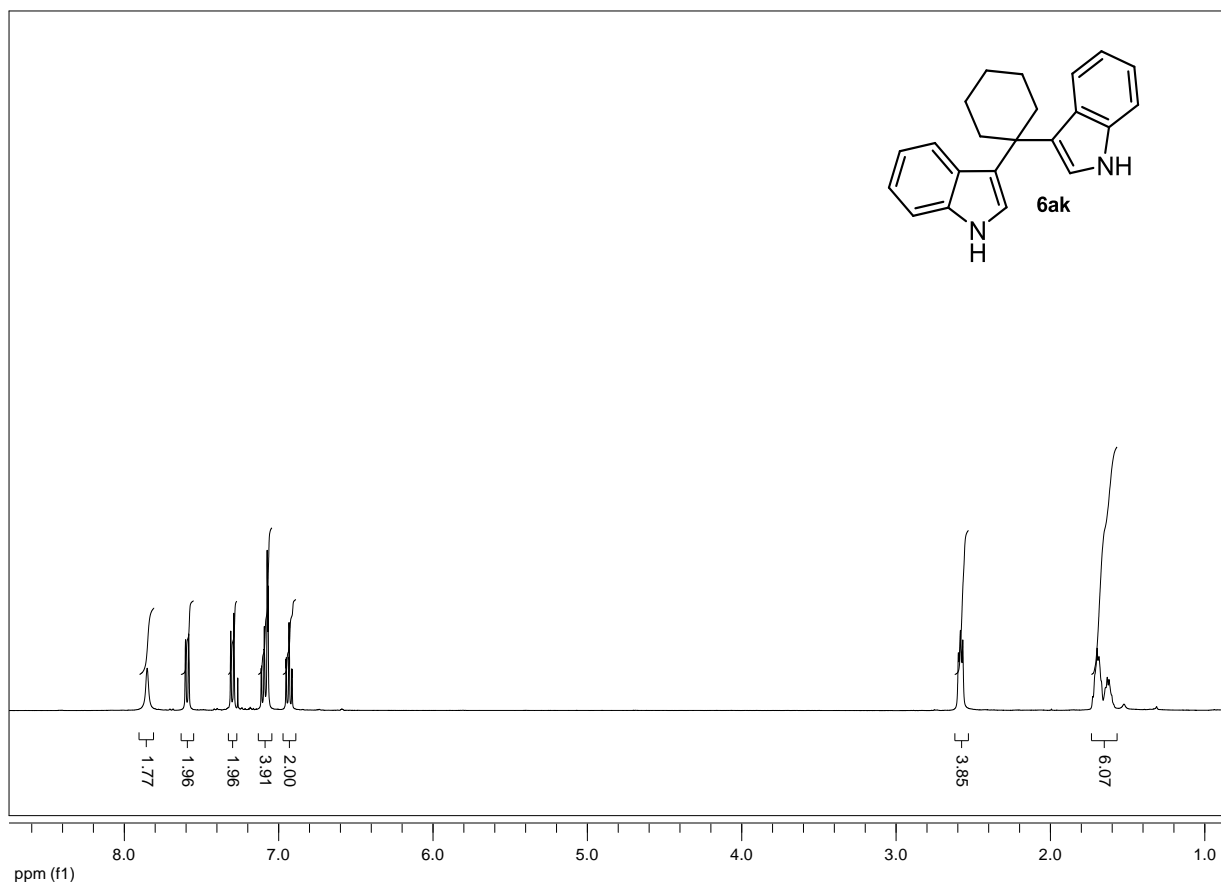

**<sup>1</sup>H NMR spectrum for compound 6ba (400 MHz, CDCl<sub>3</sub>)**

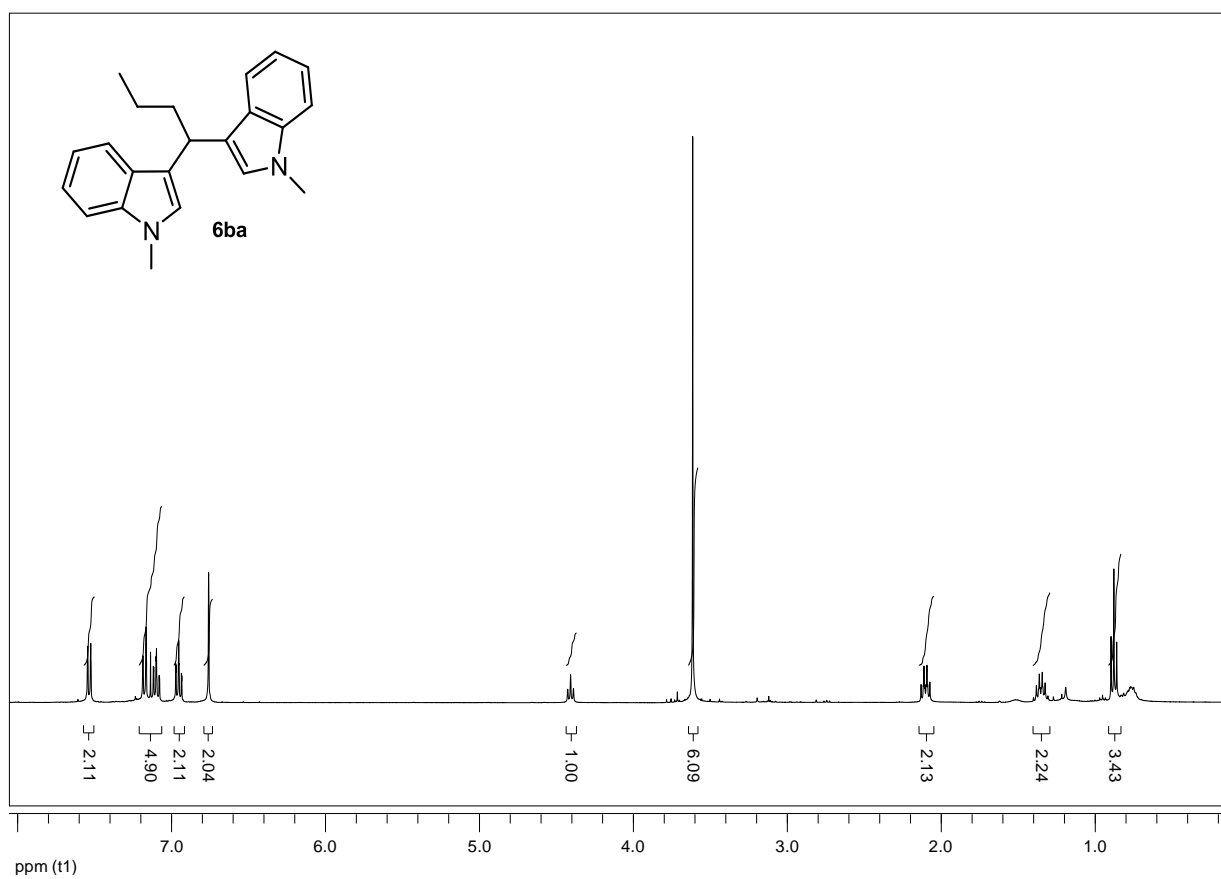



**<sup>1</sup>H NMR spectrum for the crude of the reaction giving 6ca (400 MHz, CDCl<sub>3</sub>)**

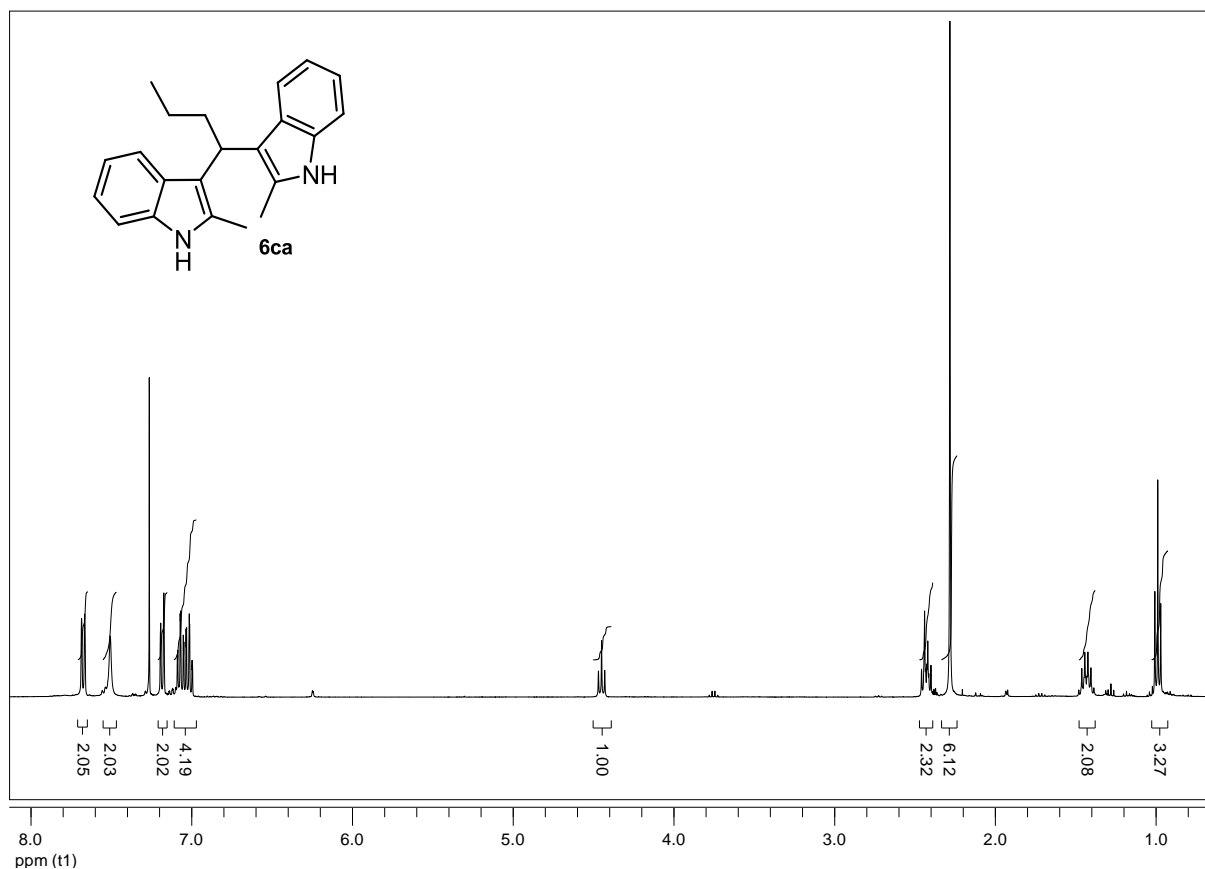

**<sup>1</sup>H NMR spectrum for compound 6da (400 MHz, CDCl<sub>3</sub>)**

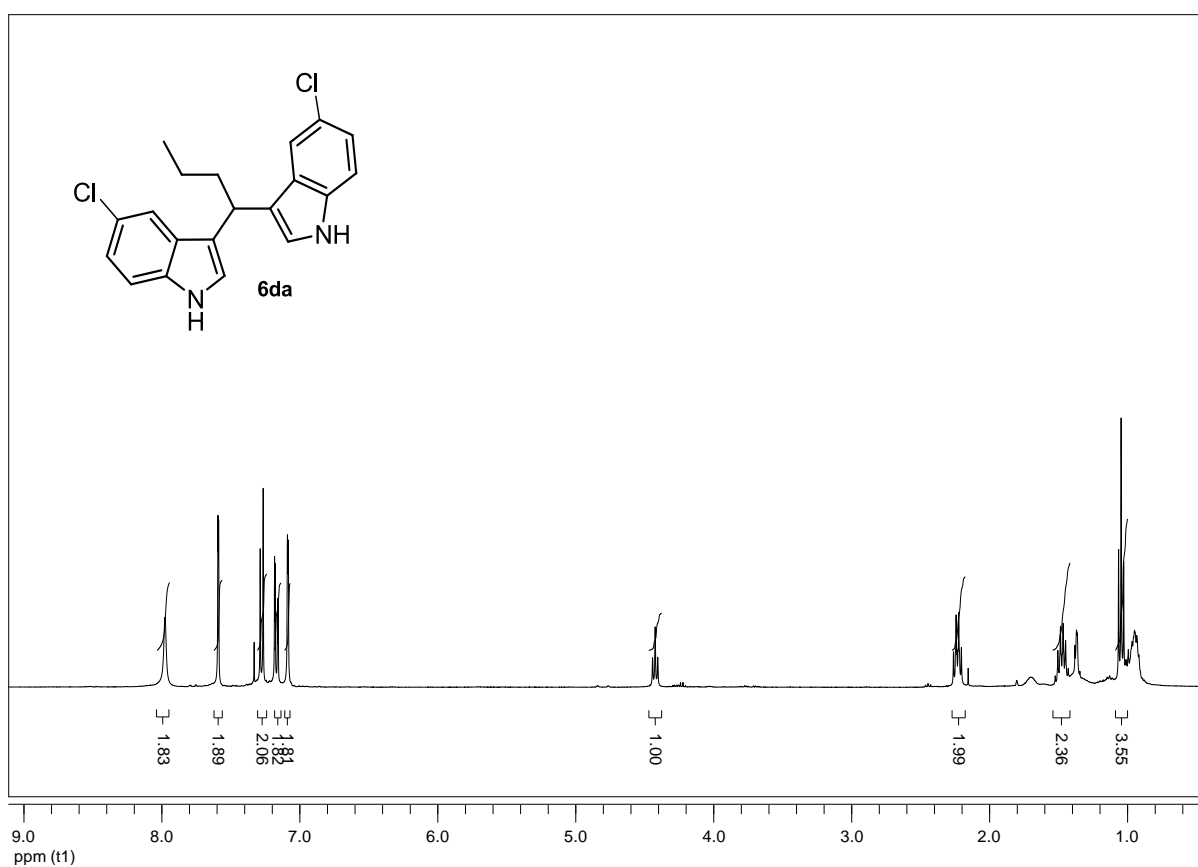

**<sup>1</sup>H NMR spectrum for compound 6ea (400 MHz, CDCl<sub>3</sub>)**

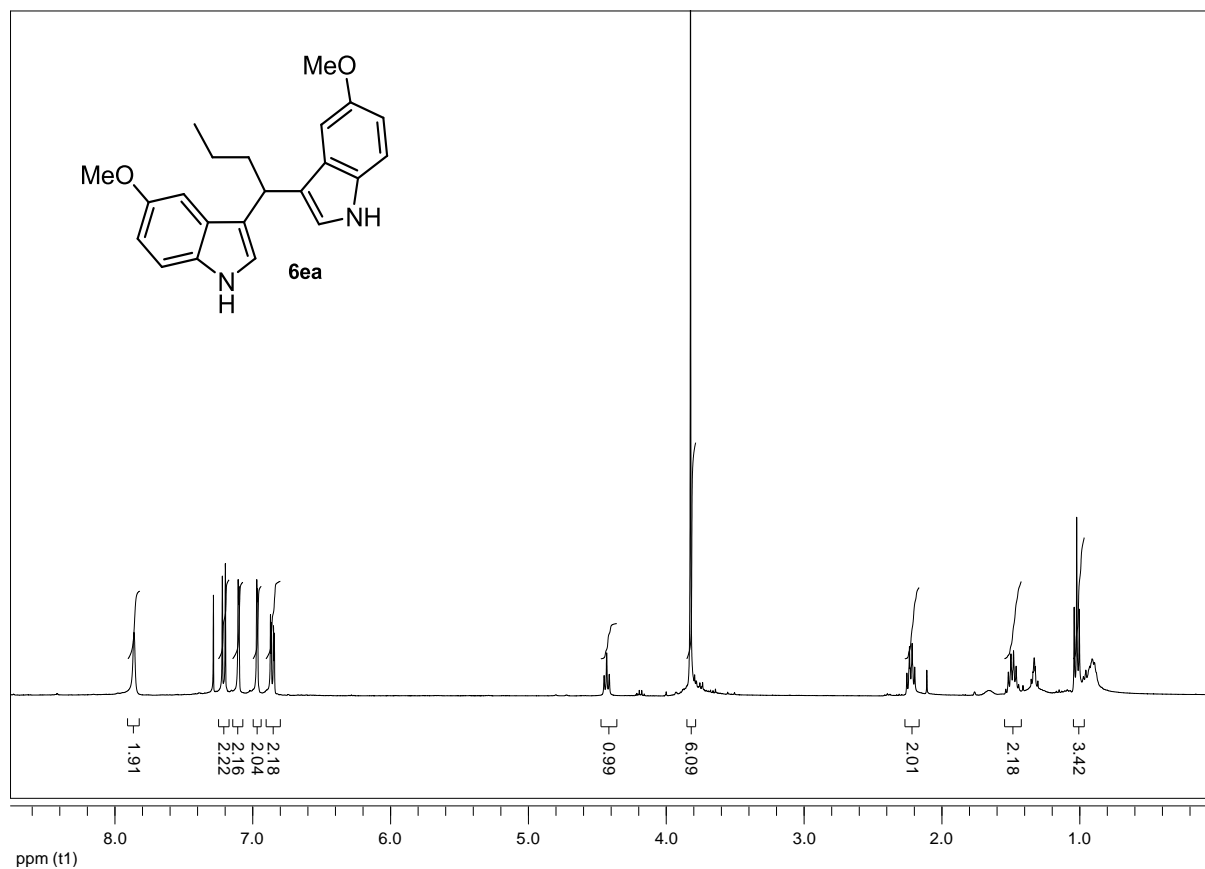

**<sup>1</sup>H NMR spectrum for compound 6al (400 MHz, CDCl<sub>3</sub>)**

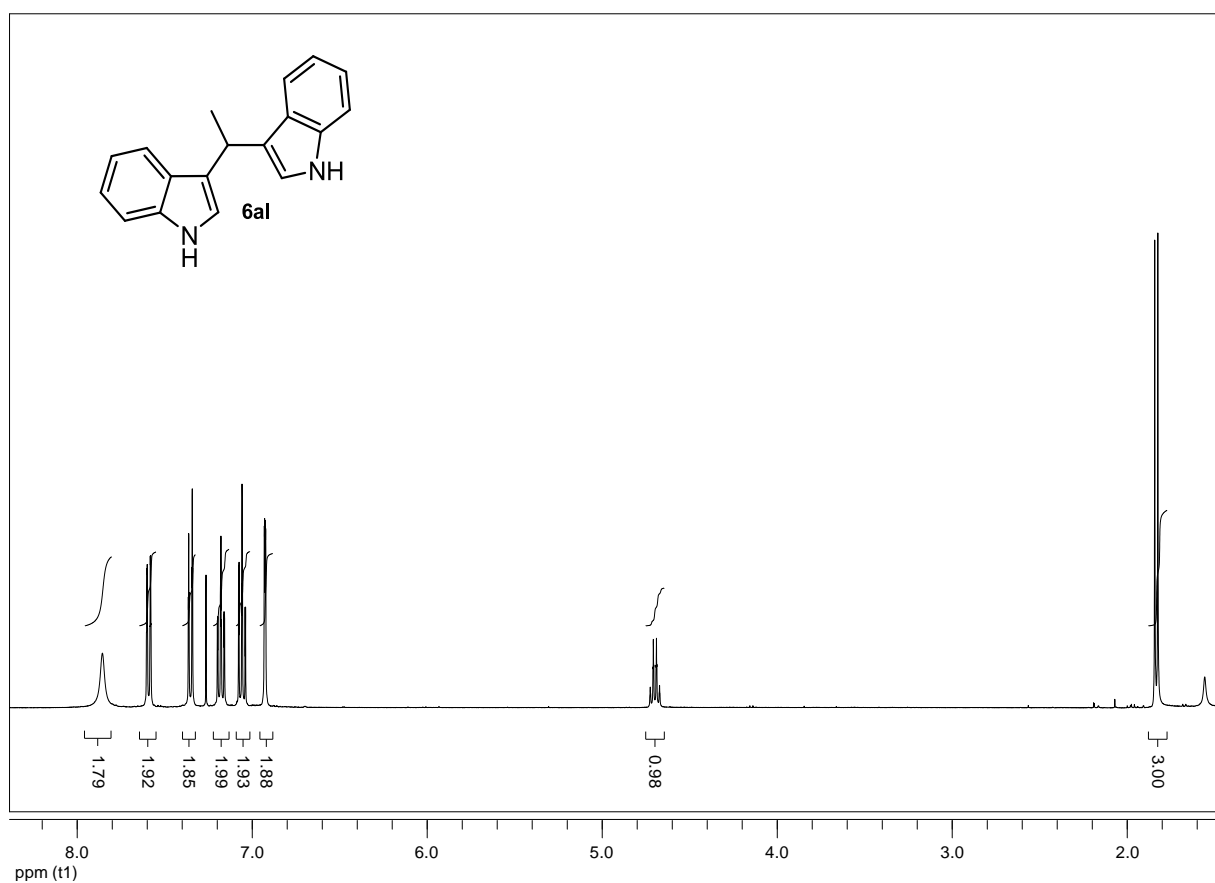

## X-RAY CRYSTALLOGRAPHY

The crystals were mounted in inert oil on glass fibers and transferred to the cold gas stream of an Xcalibur Oxford Diffraction diffractometer equipped with a low-temperature attachment. Data were collected using monochromated Mo K $\alpha$  radiation ( $\lambda = 0.71073$  Å). Scan type:  $\omega$ . Absorption correction based on multiple scans was applied using spherical harmonics implemented in SCALE3 ABSPACK scaling algorithm [13]. The structures were solved by direct methods and refined on  $F^2$  using the program SHELXL-97 [14]. All non-hydrogen atoms were refined anisotropically. Hydrogen atoms were included in calculated positions and refined using a riding model, with the exception of NH atoms. Refinements were carried out by full-matrix least-squares on  $F^2$  for all data.

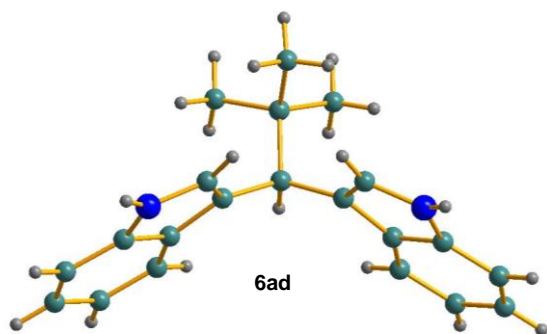

Crystal data of **6ad**: [C<sub>21</sub>H<sub>22</sub>N<sub>2</sub>], orthorhombic,  $Pna2_1$ ,  $a = 11.099(2)$  Å,  $b = 19.895(4)$  Å,  $c = 7.6414(15)$  Å,  $Z = 4$ ,  $M_r = 302.41$  g mol<sup>-1</sup>,  $V = 1687.3(6)$  Å<sup>3</sup>,  $D_{\text{calcd}} = 1.190$  g cm<sup>-3</sup>,  $\lambda(\text{Mo K}\alpha) = 0.71073$  Å,  $T = 100$  K,  $\mu = 0.070$  mm<sup>-1</sup>, 9103 reflections collected, 3055 unique ( $R_{\text{int}} = 0.0565$ ),  $R1(F_o) = 0.0502$  [ $I > 2\sigma(I)$ ],  $wR2(F_o^2) = 0.0852$  (all data), GOF = 1.012. CCDC 1007024.

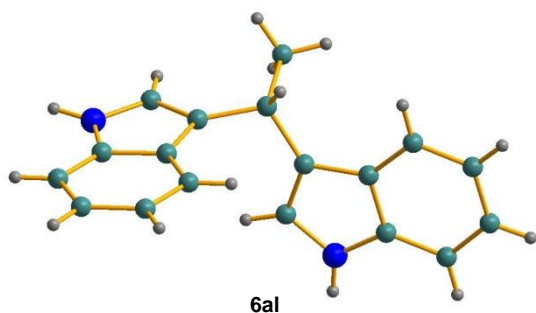

Crystal data of **6al**: [C<sub>18</sub>H<sub>16</sub>N<sub>2</sub>], orthorhombic,  $P2_12_12_1$ ,  $a = 6.5030(13)$  Å,  $b = 9.927(2)$  Å,  $c = 21.129(4)$  Å,  $Z = 4$ ,  $M_r = 260.33$  g mol<sup>-1</sup>,  $V = 1363.9(3)$  Å<sup>3</sup>,  $D_{\text{calcd}} = 1.268$  g cm<sup>-3</sup>,  $\lambda(\text{Mo K}\alpha) = 0.71073$  Å,  $T = 173$  K,  $\mu = 0.075$  mm<sup>-1</sup>, 7915 reflections collected, 2518 unique ( $R_{\text{int}} = 0.0438$ ),  $R1(F_o) = 0.0374$  [ $I > 2\sigma(I)$ ],  $wR2(F_o^2) = 0.0692$  (all data), GOF = 1.031. CCDC 1007025.

## References

1. Peng, Y.-Y.; Zhang, Q.-L., Yuan, J.-J., Cheng, J.-P. *Chin. J. Chem.* **2008**, *26*, 2228-223.
2. Xu, H.-Y.; Zi, Y.; Xu, X.-P.; Wang, S.-Y.; Ji, S.-J. *Tetrahedron* **2013**, *69*, 1600-1605.
3. Ramesh, C.; Banerjee, J.; Pal, R.; Das, B. *Adv. Synth. Catal.* **2003**, *345*, 557-559.
4. An, L.-T.; Ding, F.-Q., Zhou, J.-P.; Lu, X.-H., Zhang, L.-L. *Chin. J. Chem.* **2007**, *25*, 822-827.
5. Ji, S.-J.; Zhou, M.-F.; Gu, D.-G.; Jiang, Z.-Q.; Loh, T.-P. *Eur. J. Org. Chem.* **2004**, 1584-1587.
6. Khalafi-Nezhad, A.; Parhami, A.; Zare, A.; Moosavi Zare, A. R.; Hasaninejad, A.; Panahi, F. *Synthesis* **2008**, 617-621.
7. Veluri, R.; Oka, I.; Wagner-Döbler, I.; Laatsch, H. *J. Nat. Prod.* **2003**, *66*, 1520-1523.
8. Magesh, C. J.; Nagarajan, R.; Karthik, M.; Perumal, P. T. *Appl. Catal., A: Gen.* **2004**, *266*, 1-10.
9. Thirupathi, P.; Kim, S. S. *J. Org. Chem.* **2010**, *75*, 5240-5249.
10. Dhiman, S.; Ramasastry, S. S. V. *Org. Biomol. Chem.* **2013**, *11*, 8030-8035.
11. Pal, R.; Khannobis, S.; Sarkar, T. *Chem. J.* **2013**, *3*, 7-12.
12. Ramachandiran, K.; Muralidharan, D.; Perumal, P. T. *Tetrahedron Lett.* **2011**, *52*, 3579-3583.
13. CrysAlisPro, Agilent Technologies, Version 1.171.35.11. Multi-scans absorption correction with SCALE3 ABSPACK scaling algorithm.
14. G. M. Sheldrick, SHELXL-97, Program for Crystal Structure Refinement, University of Göttingen, Göttingen, Germany, 1997.
